# Supplementary material
Source: Springer Nature journal article supplement (https://www.springermedizin.de/resource/supplementary/12960_2012_326_MOESM4_ESM.pdf/9569956)
Supplement: MOESM4 [file 9569956]

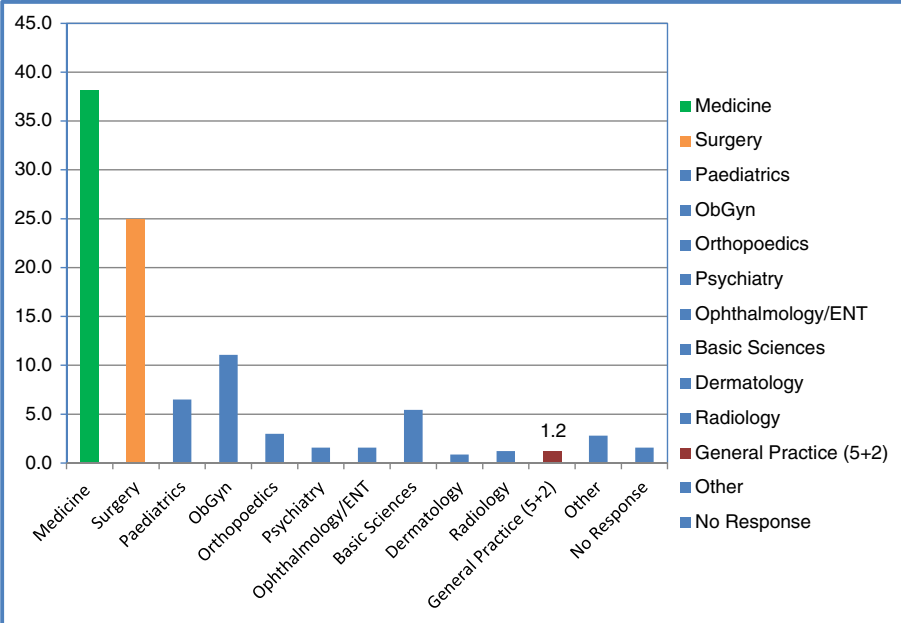

### Comparison of most favoured choices

| Category              | Medicine        | Surgery         |
|-----------------------|-----------------|-----------------|
| Males                 | 146/344 (42.4%) | 105/344 (30.5%) |
| Females               | 71/219 (32.4%)  | 35/219 (16.0%)  |
| In Kathmandu College  | 94/223 (42.2%)  | 56/223 (25.1%)  |
| Out Kathmandu College | 123/345 (35.7%) | 86/345 (24.9%)  |
| SLC in Kathmandu      | 86/200 (43%)    | 49/200 (24.5%)  |
| SLC Out of Kathmandu  | 128/358 (35.8%) | 90/358 (25.1%)  |
| Year 1                | 145/346 (41.9%) | 63/346 (25.6%)  |
| Final and Doctors     | 71/221 (32.1%)  | 79/221 (35.7%)  |
